# Supplementary material
Source: publisher figshare collection journal article supplement (https://gsapubs.figshare.com/ndownloader/files/23316731)
Supplement: Supplementary file 1 [file 23316731]

## Sheet: EMPA and LAICPMS APFU 
Table S3. Apatite chemistry for all AFT age and length grains, Imperial Formation, Mackenzie Plain, NWT, Canada
A2Z Sample	Na	Mg	P	S	Ca	Mn	Fe	As	Sr	Y	La	Ce	F	Cl	OH	TOTAL	rmr0	Ca SITE	P SITE	F+Cl+OH	TOTAL
No.	(apfu)	(apfu)	(apfu)	(apfu)	(apfu)	(apfu)	(apfu)	(apfu)	(apfu)	(apfu)	(apfu)	(apfu)	(apfu)	(apfu)	(apfu)	(apfu)		10	6	2	WT% OX
JPCPC3, Imperial Fm. (siltstone) Powell River section, ~0.70 %Ro, 65.277 N, 128.774 W
AFT Age-Grains
P1420_003_Ap_A_1_POS_0	0.0335	0.0263	6.0633	-	9.6825	0.0173	0.0384	0.0002	0.0084	0.0047	0.0084	0.0212	0.9958	0.1564	0.8478	17.9	0.7223	9.84	6.06	2	92.93
P1420_003_Ap_A_1_POS_2	0.0379	0.0112	5.9307	-	10.0502	0.0257	0.0104	0.0002	0.0029	0.0042	0.0097	0.0218	1.2148	0.1372	0.6481	18.1	0.7801	10.17	5.93	2	94.89
P1420_003_Ap_A_1_POS_5	0.0004	0.0003	6.1689	-	9.5428	0.0106	0.0034	0	0.0153	0.0009	0.0007	0.0019	1.5073	0.0218	0.4709	17.7	0.8335	9.58	6.17	2	89.59
P1420_003_Ap_A_1_POS_6	0.0139	0.0783	6.0684	-	9.6602	0.0098	0.0425	0.0004	0.0073	0.0057	0.0026	0.0072	1.3851	0.0532	0.5616	17.9	0.7648	9.83	6.07	2	96.27
P1420_003_Ap_A_1_POS_7	0.0716	0.0857	5.8816	-	10.0397	0.0066	0.0338	0	0.0397	0.0021	0.0099	0.0246	1.8129	0.0478	0.1393	18.2	0.7947	10.31	5.88	2	91.76
P1420_003_Ap_A_1_POS_8	0.1256	0.0115	5.911	-	10.0096	0.0118	0.0151	0.0002	0.014	0.0037	0.0179	0.0431	1.403	0.4243	0.1727	18.2	0.7276	10.25	5.91	2	93.05
P1420_003_Ap_A_1_POS_9	0.0115	0.0024	5.9578	-	9.9796	0.0094	0.0036	0	0.0023	0.0148	0.0133	0.0402	2.0264	0	0	18.1	0.8547	10.08	5.96	2.03	94.55
P1420_003_Ap_A_1_POS_10	0.0299	0.0003	5.8639	-	10.2778	0.0025	0.0013	0.0003	0.0296	0.0006	0.0015	0.0067	1.5742	0.0015	0.4243	18.2	0.8422	10.35	5.86	2	97.14
P1420_003_Ap_A_1_POS_11	0.0086	0.0714	6.061	-	9.6807	0.0086	0.0442	0.0001	0.012	0.0048	0.0036	0.009	1.7792	0.1507	0.0701	17.9	0.7692	9.84	6.06	2	94.6
P1420_003_Ap_A_1_POS_13	0	0	6.0074	-	9.9814	0	0	0	0	0	0	0	1.2856	0.1127	0.6017	18	0.82	9.98	6.01	2	94.66
P1420_003_Ap_A_1_POS_14	0.0235	0.0079	6.0934	-	9.6809	0.0122	0.0106	0.0001	0.0047	0.006	0.0054	0.014	1.7519	0.0423	0.2058	17.9	0.8303	9.77	6.09	2	95.25
P1420_003_Ap_A_1_POS_15	0.0191	0.0901	5.9556	-	9.9119	0.0093	0.0311	0	0.0366	0.0026	0.0036	0.0087	1.7326	0.0803	0.1871	18.1	0.7927	10.11	5.96	2	89.25
P1420_003_Ap_A_1_POS_16	0.0124	0.003	6.0055	-	9.9532	0.008	0.0038	0.0001	0.0016	0.0012	0.0017	0.0039	0.6196	0.1208	1.2596	18	0.8012	9.99	6.01	2	100.34
P1420_003_Ap_A_1_POS_17	0.0198	0.0008	5.974	-	10.0069	0.0058	0.0036	0.0001	0.016	0.0013	0.004	0.0092	1.7245	0.0082	0.2673	18	0.8451	10.07	5.97	2	94.43
P1420_003_Ap_A_1_POS_19	0.0295	0.0028	6.025	-	9.7993	0.0159	0.0052	0.0062	0.0096	0.0073	0.0122	0.0303	1.1802	0.1831	0.6367	17.9	0.7825	9.91	6.03	2	90.44
P1420_003_Ap_A_1_POS_20	0.0066	0	6.017	-	9.8777	0.0051	0.0024	0.0007	0.0267	0.0039	0.0051	0.0182	1.1557	0.0297	0.8146	18	0.8167	9.95	6.02	2	89.91
P1420_003_Ap_A_1_POS_21	0.1142	0.0301	5.9499	-	9.83	0.0313	0.0306	0.0001	0.0306	0.0048	0.0197	0.0522	0.9741	0.3246	0.7013	18.1	0.6692	10.14	5.95	2	89.15
P1420_003_Ap_A_1_POS_22	0.0977	0.1012	5.9196	-	9.8325	0.0137	0.0385	0	0.054	0.0037	0.0191	0.052	1.0522	0.348	0.5998	18.1	0.6577	10.21	5.92	2	90.37
P1420_003_Ap_A_1_POS_24	0.0234	0.0021	6.0781	-	9.6631	0.0129	0.0131	0	0.0031	0.0098	0.0165	0.0395	1.8679	0.0234	0.1087	17.9	0.8331	9.78	6.08	2	94.74
P1420_003_Ap_A_1_POS_25	0.021	0.0815	6.1851	-	9.3513	0.008	0.0296	0	0.0333	0.0024	0.0033	0.0098	1.3074	0.0282	0.6644	17.7	0.7815	9.54	6.19	2	86.5
P1420_003_Ap_A_1_POS_27	0.0628	0.0782	5.8578	-	10.0799	0.0104	0.0426	0	0.0162	0.0046	0.0175	0.0426	1.7327	0.1906	0.0767	18.2	0.7512	10.35	5.86	2	89.28
P1420_003_Ap_A_1_POS_28	0.1188	0.0375	5.8929	-	10.0063	0.0237	0.0317	0.0014	0.0127	0.0048	0.0147	0.0425	1.1414	0.3419	0.5167	18.2	0.6852	10.29	5.89	2	92.73
P1420_003_Ap_A_1_POS_29	0.0047	0.0016	5.9639	-	10.0665	0.0102	0.0049	0	0.0002	0.0015	0.0003	0.0013	1.6208	0.0174	0.3618	18.1	0.8384	10.09	5.96	2	97.15
P1420_003_Ap_A_1_POS_33	0.0057	0.0148	6.0363	-	9.7924	0.0126	0.0474	0	0.0036	0.0099	0.0032	0.0106	1.9265	0.0992	0	18	0.7831	9.9	6.04	2.03	91.64
P1420_003_Ap_A_1_POS_34	0.0395	0.0054	5.9752	-	9.9124	0.0088	0.0046	0.0001	0.0075	0.0025	0.019	0.0473	1.8218	0.0631	0.115	18	0.8354	10.05	5.98	2	93.25
P1420_003_Ap_A_1_POS_35	0.0582	0.0325	6.0136	-	9.7871	0.0239	0.037	0.0002	0.0093	0.0027	0.0074	0.021	1.1111	0.2059	0.683	18	0.715	9.98	6.01	2	92.71
P1420_003_Ap_A_1_POS_36	0.0051	0.0008	5.915	-	10.1831	0.0111	0.0031	0	0.0013	0.0061	0.0001	0.0008	1.9819	0.0066	0.0115	18.1	0.857	10.21	5.91	2	95.72
P1420_003_Ap_A_1_POS_37	0.0205	0	6.0419	-	9.8119	0.0207	0.0068	0	0.0008	0.0281	0.0003	0.0014	2.0554	0	0	18	0.8486	9.89	6.04	2.06	96.78
P1420_003_Ap_A_1_POS_39	0.0426	0.0098	5.999	-	9.8654	0.0179	0.0119	0	0.0046	0.0061	0.0106	0.031	1.7222	0.0718	0.206	18	0.8177	10	6	2	95.27
AFT Length-Grains
P1420_003_Ap_A_2_POS_1	0.0195	0.0013	5.8681	-	10.2982	0.0066	0.0009	0.0001	0.0009	0.0076	0	0.0002	1.6213	0.015	0.3637	18.2	0.8436	10.34	5.87	2	96.1
P1420_003_Ap_A_2_POS_2	0.03	0.0195	5.9754	-	9.9034	0.0085	0.0159	0	0.0156	0.0048	0.0148	0.0361	1.2012	0.2318	0.567	18	0.7613	10.05	5.98	2	101.25
P1420_003_Ap_A_2_POS_3	0.0344	0.0543	6.0165	-	9.7719	0.0184	0.0388	0	0.008	0.0073	0.0069	0.0192	1.4259	0.0973	0.4769	18	0.7586	9.96	6.02	2	93.32
P1420_003_Ap_A_2_POS_5	0.013	0	6.1381	-	9.5939	0.0184	0.0048	0	0.0053	0.0031	0.0039	0.0102	0.9599	0.075	0.965	17.8	0.7917	9.65	6.14	2	92.95
P1420_003_Ap_A_2_POS_7	0.0566	0.059	6.0026	-	9.7553	0.0057	0.0191	0	0.077	0.0036	0.0084	0.0208	1.7333	0.0218	0.2449	18	0.8145	10.01	6	2	93.2
P1420_003_Ap_A_2_POS_8	0.0288	0.0032	5.9828	-	9.8975	0.0162	0.0043	0.0002	0.0074	0.0102	0.0133	0.0428	1.7175	0.058	0.2245	18	0.8292	10.02	5.98	2	94.51
P1420_003_Ap_A_2_POS_9	0.0285	0.0581	6.0075	-	9.7889	0.0089	0.0332	0	0.0074	0.0058	0.012	0.0292	1.3396	0.243	0.4174	18	0.7387	9.97	6.01	2	95.64
P1420_003_Ap_A_2_POS_10	0.0599	0.0303	6.0554	-	9.6699	0.0183	0.0409	0	0.0104	0.0039	0.0088	0.0284	0.9945	0.1562	0.8493	17.9	0.7132	9.87	6.06	2	93.17
P1420_003_Ap_A_2_POS_11	0.0143	0.0055	5.9766	-	9.9053	0.0171	0.016	0	0.0104	0.003	0.0212	0.0404	0.8027	0.1732	1.0241	18	0.7475	10.03	5.98	2	101.47
P1420_003_Ap_A_2_POS_13	0.0069	0.0021	6.0802	-	9.7716	0.0118	0.0028	0.001	0.0022	0.0014	0.0001	0.0005	1.5873	0.0209	0.3918	17.9	0.8378	9.8	6.08	2	93.78
P1420_003_Ap_A_2_POS_14	0.0091	0.0008	6.145	-	9.6048	0.0092	0.0026	0.0006	0.0115	0.0007	0.0002	0.0009	0.961	0.0751	0.9639	17.8	0.8002	9.64	6.15	2	92.71
P1420_003_Ap_A_2_POS_16	0	0	6.0884	-	9.7791	0	0	0	0	0	0	0	1.029	0.3454	0.6256	17.9	0.7687	9.78	6.09	2	90.16
P1420_003_Ap_A_2_POS_17	0.107	0.0071	6.0416	-	9.6803	0.0132	0.0122	0.0001	0.0152	0.0031	0.0195	0.0536	1.2257	0.4993	0.2749	18	0.7034	9.91	6.04	2	86.15
P1420_003_Ap_A_2_POS_18	0.0074	0.0395	5.9671	-	9.9393	0.0139	0.0468	0	0.0058	0.0075	0.0035	0.0114	1.3388	0.0889	0.5723	18	0.7496	10.07	5.97	2	97.25
P1420_003_Ap_A_2_POS_19	0.0296	0.0018	5.8652	-	10.28	0.0039	0.0018	0.0001	0.023	0.0006	0.0012	0.006	1.5745	0.0015	0.424	18.2	0.8415	10.35	5.87	2	97.07
P1420_003_Ap_A_2_POS_21	0.0275	0.0124	5.9315	-	10.0351	0.0153	0.0117	0	0.0076	0.0018	0.018	0.0304	1.8888	0.0925	0.0187	18.1	0.8246	10.16	5.93	2	92.06
P1420_003_Ap_A_2_POS_22	0	0	5.9642	-	10.0894	0	0	0	0	0	0	0	1.3305	0.0977	0.5717	18.1	0.8243	10.09	5.96	2	99.69
P1420_003_Ap_A_2_POS_23	0.0283	0.0003	6.0989	-	9.6954	0.0069	0.0014	0	0.0042	0.0013	0.0064	0.0126	1.8061	0.0293	0.1646	17.9	0.8478	9.76	6.1	2	92.88
P1420_003_Ap_A_2_POS_25	0.0061	0.0052	6.0438	-	9.825	0.0098	0.01	0.0001	0.0053	0.0015	0.0055	0.0144	1.6318	0.0766	0.2917	17.9	0.823	9.88	6.04	2	91.65
P1420_003_Ap_A_2_POS_26	0.0478	0.0003	5.9914	-	9.8694	0.0248	0.0082	0.0001	0.0068	0.0069	0.0127	0.039	1.384	0.2186	0.3974	18	0.7772	10.02	5.99	2	88.17
P1420_003_Ap_A_2_POS_27	0.0092	0	6.0415	-	9.8547	0.0071	0.0017	0	0.0019	0.017	0.0001	0.0005	1.9833	0.0099	0.0069	17.9	0.8589	9.89	6.04	2	92.18
P1420_003_Ap_A_2_POS_28	0.04	0.069	5.8488	-	10.1647	0.0095	0.0303	0.0004	0.0201	0.0038	0.0096	0.0289	1.4237	0.1472	0.4291	18.2	0.7638	10.38	5.85	2	92.01
P1420_003_Ap_A_2_POS_29	0.1122	0.1315	5.9083	-	9.8136	0.0149	0.043	0.0004	0.0547	0.0036	0.0185	0.054	1.0502	0.3473	0.6025	18.2	0.6392	10.25	5.91	2	90.6
P1420_003_Ap_A_2_POS_30	0.0122	0	6.0583	-	9.7835	0.0091	0.0031	0.0002	0.0067	0.0038	0.0067	0.0198	1.5835	0.0286	0.3879	17.9	0.8352	9.84	6.06	2	90.71
P1420_003_Ap_A_2_POS_31	0.1547	0.0318	5.9432	-	9.819	0.0331	0.0277	0.0001	0.0244	0.0046	0.0216	0.0594	0.973	0.3242	0.7028	18.1	0.6688	10.18	5.94	2	89.33
P1420_003_Ap_A_2_POS_33	0.0034	0	5.9297	-	10.0892	0.0069	0.0082	0.0001	0.0021	0.005	0.0099	0.0301	2.0795	0.03	0	18.2	0.8476	10.15	5.93	2.11	95.68
P1420_003_Ap_A_2_POS_34	0.0661	0.0095	6.2784	-	9.1474	0.0093	0.0102	0	0.039	0.0023	0.0096	0.0251	1.0052	0.1607	0.8341	17.6	0.7681	9.32	6.28	2	94.51
P1420_003_Ap_A_2_POS_36	0.0149	0.0034	5.965	-	9.8832	0.0221	0.0089	0.0001	0.0027	0.0169	0.022	0.0675	1.6585	0.1752	0.1663	18	0.7988	10.04	5.97	2	90.94
P1420_003_Ap_A_2_POS_37	0	0.0008	6.0562	-	9.8311	0.0099	0.0019	0	0.0054	0.001	0.0016	0.0044	1.6623	0.0116	0.3261	17.9	0.8443	9.86	6.06	2	95.75
P1420_003_Ap_A_2_POS_39	0.0245	0.0325	6.0204	-	9.7982	0.0261	0.0264	0	0.0105	0.0018	0.0068	0.0202	1.1124	0.2061	0.6815	18	0.7355	9.95	6.02	2	92.54
P1420_003_Ap_A_2_POS_40	0	0	5.9219	-	10.1952	0	0	0	0	0	0	0	1.9842	0.0066	0.0092	18.1	0.8655	10.2	5.92	2	95.51
P1420_003_Ap_A_2_POS_41	0.014	0	5.974	-	10.007	0.006	0.0024	0.0002	0.0046	0.0062	0.0039	0.0149	1.8268	0.0102	0.163	18	0.851	10.06	5.97	2	98.42
P1420_003_Ap_A_2_POS_42	0	0	5.9944	-	9.9753	0.0077	0.0031	0.002	0.005	0.0007	0.0028	0.0084	1.235	0.2319	0.533	18	0.79	10	6	2	95.41
P1420_003_Ap_A_2_POS_43	0.0261	0.0473	5.925	-	10.0089	0.0122	0.0344	0.0002	0.0108	0.003	0.009	0.0283	1.0201	0.1852	0.7946	18.1	0.7262	10.18	5.93	2	92.66
P1420_003_Ap_A_2_POS_44	0.0147	0.0018	6.0727	-	9.7203	0.0104	0.0027	0.0003	0.0028	0.0473	0.0001	0.0007	1.8109	0.0099	0.1791	17.9	0.8467	9.8	6.07	2	97.14
P1420_003_Ap_A_2_POS_45	0.0032	0.0006	6.0039	-	9.9195	0.0055	0.0023	0.0001	0.0065	0.0022	0.0085	0.0254	1.7185	0.0116	0.2699	18	0.8462	9.97	6	2	91.28
P1420_003_Ap_A_2_POS_46	0.0601	0.0071	5.9952	-	9.859	0.0213	0.0098	0	0.0039	0.0065	0.0117	0.0357	1.721	0.0718	0.2072	18	0.8173	10.02	6	2	95.41
P1420_003_Ap_A_2_POS_47	0.0071	0.0024	5.9339	-	10.0862	0.0089	0.0027	0.0036	0.0054	0.0164	0.002	0.013	1.5151	0.0182	0.4667	18.1	0.8342	10.14	5.94	2	93.09
P1420_003_Ap_A_2_POS_48	0.0084	0	6.075	-	9.7424	0.0053	0.0016	0.0111	0.0037	0.0015	0.0064	0.0103	2.09	0	0	18	0.8616	9.78	6.09	2.09	96.76
P1420_003_Ap_A_2_POS_49	0.0186	0	5.9895	-	9.9268	0.0134	0.0051	0.0002	0.0046	0.004	0.0114	0.029	1.1614	0.1607	0.6779	18	0.7884	10.01	5.99	2	100.75
P1420_003_Ap_A_2_POS_50	0.0053	0.0073	5.8231	-	10.343	0.0181	0.0092	0	0.0041	0.0041	0.0103	0.0242	1.2381	0.1616	0.6003	18.2	0.7852	10.43	5.82	2	94.67
P1420_003_Ap_A_2_POS_51	0.0037	0.0014	5.8003	-	10.4661	0.0091	0.0031	0	0.0033	0.0017	0.0024	0.0055	1.5061	0.0325	0.4614	18.3	0.8331	10.5	5.8	2	89.07
P1420_003_Ap_A_2_POS_52	0.0442	0.1078	5.8726	-	10.0549	0.0095	0.0383	0	0.0184	0.0031	0.0111	0.0307	2.0743	0.0342	0	18.3	0.799	10.32	5.87	2.11	98.61
P1420_003_Ap_A_2_POS_54	0.0433	0.0298	5.9726	-	9.8987	0.0283	0.0277	0.0002	0.0111	0.0026	0.0079	0.0233	0.834	0.1822	0.9838	18	0.7153	10.07	5.97	2	101.33
P1420_003_Ap_A_2_POS_56	0.0268	0.0028	5.8347	-	10.1987	0.0191	0.0071	0.0005	0.0025	0.0179	0.021	0.0735	1.7162	0.0488	0.235	18.2	0.8235	10.37	5.84	2	92.97
P1420_003_Ap_A_2_POS_57	0.0238	0.0063	5.8182	-	10.3346	0.0082	0.0108	0	0.0075	0.0051	0.011	0.034	1.2282	0.198	0.5738	18.3	0.7791	10.44	5.82	2	100.85
P1420_003_Ap_A_2_POS_58	0.0028	0.0003	5.9959	-	9.974	0.0073	0.0041	0	0.0046	0.0089	0.0005	0.003	1.6109	0.0247	0.3644	18	0.8385	10.01	6	2	93.65
P1420_003_Ap_A_2_POS_59	0.0115	0.0075	5.9387	-	10.1038	0.0099	0.0073	0.0001	0.0043	0.0091	0.0001	0.0004	1.4304	0.098	0.4716	18.1	0.8135	10.15	5.94	2	97.03
P1420_003_Ap_A_2_POS_61	0.0281	0.002	5.9841	-	9.9178	0.0298	0.0027	0.0006	0.0012	0.0042	0.0122	0.0307	0.9581	0.0054	1.0365	18	0.8007	10.03	5.98	2	100.86
P1420_003_Ap_A_2_POS_62	0.0379	0.0005	6.0493	-	9.7948	0.0075	0.0023	0	0.0047	0.0056	0.0077	0.0187	1.498	0.0581	0.4439	17.9	0.8271	9.88	6.05	2	91.4
P1420_003_Ap_A_2_POS_63	0.0299	0.0008	5.8972	-	10.075	0.0175	0.0159	0.0002	0.0035	0.008	0.0201	0.0578	1.3728	0.1965	0.4307	18.1	0.7729	10.23	5.9	2	91.17
P1420_003_Ap_A_2_POS_64	0.0665	0.0551	6.002	-	9.7596	0.0105	0.0217	0	0.0087	0.0054	0.0188	0.0465	2.0185	0.1285	0	18.1	0.8012	9.99	6	2.15	95.81
P1420_003_Ap_A_2_POS_65	0.031	0.003	5.9863	-	9.9214	0.0307	0.0048	0.0001	0.0014	0.0033	0.0094	0.0255	0.9584	0.0054	1.0362	18	0.7978	10.03	5.99	2	100.74
JPCPC4, Imperial Fm. (siltstone) Imperial River section, ~0.66 %Ro, 65.116 N, 127.859 W
AFT Age-Grains
P1420_004_Ap_A_1_POS_0	0.0203	0.0726	6.0558	-	9.6594	0.0074	0.0201	0.0001	0.0565	0.0022	0.0054	0.0151	2.0361	0.0817	0	18	0.8163	9.86	6.06	2.12	94.62
P1420_004_Ap_A_1_POS_1	0.0218	0.0564	5.9623	-	9.928	0.0246	0.0466	0	0.0083	0.0018	0.0028	0.0085	0.6047	0.1255	1.2698	18.1	0.7204	10.1	5.96	2	90.97
P1420_004_Ap_A_1_POS_2	0.0183	0.0097	6.012	-	9.9037	0.0083	0.0079	0	0.0117	0.0029	0.0024	0.0077	1.2985	0.0508	0.6507	18	0.8128	9.97	6.01	2	92.97
P1420_004_Ap_A_1_POS_3	0	0.0016	6.0462	-	9.8565	0.0137	0.0031	0	0.0029	0.0014	0.0005	0.0025	1.2186	0.0216	0.7598	17.9	0.8195	9.88	6.05	2	93.95
P1420_004_Ap_A_1_POS_4	0.0004	0	5.8532	-	10.2768	0.0111	0.0153	0.0004	0.0013	0.0253	0.0024	0.0131	1.6607	0.0138	0.3255	18.2	0.8262	10.35	5.85	2	81.83
P1420_004_Ap_A_1_POS_5	0.0126	0.0077	6.1116	-	9.6359	0.0369	0.0109	0	0.0027	0.01	0.0006	0.0031	1.5116	0.023	0.4654	17.8	0.8115	9.72	6.11	2	87.61
P1420_004_Ap_A_1_POS_6	0.0375	0.0224	5.8958	-	10.0555	0.0113	0.0033	0	0.0116	0.0033	0.0212	0.0673	2.0625	0.0119	0	18.2	0.8476	10.23	5.9	2.07	94.39
P1420_004_Ap_A_1_POS_7	0.0335	0.0262	6.0643	-	9.7143	0.014	0.0251	0	0.0105	0.0008	0.0048	0.0158	2.0119	0.114	0	18	0.8058	9.85	6.06	2.13	96.43
P1420_004_Ap_A_1_POS_8	0.0223	0.0011	5.9699	-	9.9138	0.0307	0.026	0	0.0038	0.016	0.0105	0.0325	1.3472	0.0813	0.5715	18	0.7724	10.06	5.97	2	88.61
P1420_004_Ap_A_1_POS_9	0.0162	0.0005	5.9175	-	10.049	0.0161	0.02	0.0003	0.0009	0.0127	0.0141	0.0471	1.973	0.0502	0	18.1	0.8238	10.18	5.92	2.02	95.91
P1420_004_Ap_A_1_POS_10	0.079	0.0138	5.965	-	9.886	0.0159	0.0114	0.0005	0.0112	0.0029	0.015	0.0544	0.6048	0.1936	1.2016	18.1	0.7546	10.09	5.97	2	101.94
P1420_004_Ap_A_1_POS_11	0.0169	0.0221	6.0192	-	9.8172	0.0174	0.0267	0	0.004	0.0096	0.0061	0.0217	1.4438	0.081	0.4752	18	0.7845	9.94	6.02	2	94.72
P1420_004_Ap_A_1_POS_12	0.0165	0.0017	6.1145	-	9.623	0.0117	0.0065	0.0002	0.0009	0.0224	0.0031	0.0153	1.6388	0.0378	0.3234	17.8	0.8308	9.7	6.11	2	88.56
P1420_004_Ap_A_1_POS_13	0.0776	0.0534	5.9286	-	9.8258	0.0164	0.0248	0.0003	0.1462	0.0019	0.0134	0.033	0.7541	0.221	1.0249	18.1	0.6968	10.19	5.93	2	103.15
P1420_004_Ap_A_1_POS_14	0.0074	0	6.0348	-	9.8863	0.0031	0.0062	0	0.0055	0.0014	0.0012	0.0028	1.9358	0	0.0642	17.9	0.8555	9.91	6.03	2	92.04
P1420_004_Ap_A_1_POS_15	0.0105	0.0018	6.038	-	9.8251	0.0072	0.0068	0.0002	0.0046	0.0011	0.0105	0.0244	1.0848	0.0601	0.855	17.9	0.8024	9.89	6.04	2	99.51
P1420_004_Ap_A_1_POS_16	0.002	0	5.8942	-	10.2328	0.0131	0.0034	0	0.0018	0.0041	0.0006	0.0037	1.8864	0	0.1136	18.2	0.8527	10.26	5.89	2	99.64
P1420_004_Ap_A_1_POS_17	0.0178	0.0011	5.8778	-	10.1614	0.0223	0.0106	0	0.0013	0.0147	0.0132	0.0388	1.7612	0.0599	0.1788	18.2	0.8221	10.28	5.88	2	93.08
P1420_004_Ap_A_1_POS_18	0.0199	0.0197	6.1513	-	9.464	0.0118	0.02	0	0.0686	0.0017	0.0053	0.0114	1.9402	0.0812	0	17.8	0.8174	9.62	6.15	2.02	95.93
P1420_004_Ap_A_1_POS_20	0.0335	0.0332	6.0264	-	9.7487	0.0075	0.029	0	0.0756	0.0023	0.0048	0.0085	1.6768	0.0431	0.2801	18	0.7995	9.94	6.03	2	94.88
P1420_004_Ap_A_1_POS_22	0.0573	0.0195	5.9752	-	9.9031	0.0154	0.0281	0	0.0141	0.0033	0.0112	0.0209	0.7972	0.1766	1.0262	18	0.7248	10.07	5.98	2	101.3
P1420_004_Ap_A_1_POS_24	0.0363	0.0129	5.909	-	10.0706	0.0205	0.0181	0.0005	0.0034	0.0072	0.0159	0.0318	1.1474	0.1644	0.6882	18.1	0.7613	10.22	5.91	2	86.78
P1420_004_Ap_A_1_POS_25	0.0207	0.0602	5.9903	-	9.8418	0.0136	0.0588	0	0.0059	0.0064	0.0043	0.0115	1.2226	0.0285	0.7489	18	0.7314	10.02	5.99	2	96.71
P1420_004_Ap_A_1_POS_8	0.0224	0.0446	6.0227	-	9.7846	0.0177	0.0341	0	0.0081	0.0075	0.007	0.0143	1.4344	0.0478	0.5178	18	0.7773	9.94	6.02	2	99.29
P1420_004_Ap_A_1_POS_29	0.0121	0.0006	6.0929	-	9.7149	0.011	0.0137	0.0002	0.0037	0.006	0.0016	0.0039	1.2307	0.0032	0.7661	17.9	0.8097	9.77	6.09	2	88.95
P1420_004_Ap_A_1_POS_30	0.0188	0.0745	5.9441	-	9.9533	0.0064	0.0357	0	0.0156	0.0032	0.008	0.0186	1.9809	0.0419	0	18.1	0.8074	10.13	5.94	2.02	97.72
P1420_004_Ap_A_1_POS_31	0.0807	0.0325	5.9712	-	9.8964	0.0024	0.0145	0	0.0549	0.0024	0.0056	0.0125	0.6214	0.0168	1.3618	18.1	0.8056	10.1	5.97	2	101.36
P1420_004_Ap_A_1_POS_32	0.004	0.0036	5.9907	-	9.9616	0.0132	0.0128	0.0003	0.004	0.0018	0.0054	0.0098	0.853	0.1258	1.0212	18	0.7716	10.02	5.99	2	91.33
P1420_004_Ap_A_1_POS_33	0.0158	0.0003	5.9939	-	9.9549	0.0183	0.0046	0.0001	0.0023	0.004	0.0042	0.0095	1.7188	0.0078	0.2733	18	0.8393	10.01	5.99	2	91.19
P1420_004_Ap_A_1_POS_34	0.0136	0.0037	5.9427	-	10.0405	0.004	0.0068	0.0002	0.0563	0.0032	0.0043	0.0088	1.2013	0.1629	0.6358	18.1	0.791	10.14	5.94	2	89.75
P1420_004_Ap_A_1_POS_35	0.0336	0.0811	5.967	-	9.8812	0.0173	0.0392	0	0.0093	0.0041	0.0054	0.0156	1.1118	0.1263	0.762	18.1	0.7309	10.09	5.97	2	97.04
P1420_004_Ap_A_1_POS_36	0.0003	0.0626	6.1081	-	9.5767	0.0075	0.0525	0	0.0064	0.006	0.0028	0.0071	1.5366	0.0523	0.4111	17.8	0.7627	9.72	6.11	2	96.48
P1420_004_Ap_A_1_POS_38	0.0023	0.0386	5.9848	-	9.919	0.0088	0.0459	0.0002	0.0041	0.0038	0.003	0.0065	1.0487	0.0559	0.8954	18	0.7433	10.03	5.99	2	100.57
P1420_004_Ap_A_1_POS_39	0.0159	0.0173	6.0362	-	9.8039	0.0148	0.0185	0.0009	0.0095	0.0029	0.0063	0.0142	2.0957	0.0139	0	18.1	0.8345	9.9	6.04	2.11	94.11
AFT Length-Grains
P1420_004_Ap_A_2_POS_0	0.0503	0.0554	6.0544	-	9.6572	0.0096	0.0241	0	0.049	0.0026	0.0078	0.0186	2.0357	0.0817	0	18	0.8094	9.87	6.05	2.12	94.7
P1420_004_Ap_A_2_POS_1	0.0423	0.0548	5.9826	-	9.7797	0.0115	0.0187	0.0001	0.0283	0.0055	0.0229	0.0577	2.1706	0.0297	0	18.2	0.8236	10.02	5.98	2.2	91.04
P1420_004_Ap_A_2_POS_2	0.0135	0	6.0452	-	9.8549	0.0085	0.0052	0.0006	0.0038	0.001	0.0005	0.0028	1.2184	0.0216	0.76	17.9	0.8184	9.89	6.05	2	93.98
P1420_004_Ap_A_2_POS_3	0.0124	0.0035	5.9793	-	9.9098	0.009	0.0675	0	0.002	0.0223	0.0022	0.0113	1.3402	0.0111	0.6487	18	0.7362	10.04	5.98	2	100.65
P1420_004_Ap_A_2_POS_4	0.0298	0.0073	5.9005	-	10.0636	0.0136	0.0027	0.0001	0.0146	0.0029	0.022	0.0629	2.0642	0.012	0	18.2	0.8487	10.22	5.9	2.08	94.29
P1420_004_Ap_A_2_POS_5	0.0392	0.0213	6.0601	-	9.7076	0.0162	0.0268	0	0.0187	0.0013	0.0051	0.02	2.0105	0.1139	0	18	0.8015	9.86	6.06	2.12	96.62
P1420_004_Ap_A_2_POS_6	0	0	5.955	-	10.1126	0	0	0	0	0	0	0	1.9854	0.0505	0	18.1	0.8585	10.11	5.95	2.04	94.53
P1420_004_Ap_A_2_POS_7	0.0862	0.0035	5.9678	-	9.8907	0.0161	0.0097	0.0004	0.0098	0.0032	0.0187	0.0493	0.6051	0.1937	1.2012	18.1	0.7576	10.09	5.97	2	101.87
P1420_004_Ap_A_2_POS_10	0.0185	0.0439	5.9654	-	9.9333	0.0257	0.043	0	0.0086	0.0025	0.0033	0.0093	0.605	0.1256	1.2694	18.1	0.7271	10.09	5.97	2	90.93
P1420_004_Ap_A_2_POS_12	0.0129	0.0032	5.9667	-	9.9894	0.0361	0.0109	0.0001	0.0022	0.0166	0.0012	0.0053	1.8599	0.0021	0.138	18	0.8313	10.08	5.97	2	94.1
P1420_004_Ap_A_2_POS_13	0.0021	0	6.0339	-	9.8849	0.004	0.0044	0.0005	0.0072	0.0023	0.0021	0.0038	1.9355	0	0.0645	17.9	0.8571	9.91	6.03	2	92.08
P1420_004_Ap_A_2_POS_14	0.0099	0.0048	6.1155	-	9.6246	0.0115	0.0071	0	0.0016	0.0209	0.003	0.0139	1.6391	0.0378	0.3231	17.8	0.8305	9.7	6.12	2	88.52
P1420_004_Ap_A_2_POS_15	0.0866	0.0184	5.9462	-	9.855	0.0025	0.0059	0	0.1129	0.0046	0.0169	0.0428	1.5814	0.0147	0.4039	18.1	0.822	10.15	5.95	2	102.02
P1420_004_Ap_A_2_POS_16	0.028	0.0316	6.0139	-	9.8085	0.022	0.0291	0.0002	0.0041	0.0124	0.0064	0.0183	1.4425	0.0809	0.4766	18	0.7772	9.96	6.01	2	94.82
P1420_004_Ap_A_2_POS_17	0.0854	0.042	5.8162	-	10.1377	0.0166	0.0224	0	0.0735	0.0036	0.0241	0.0553	1.5846	0.0561	0.3593	18.3	0.7877	10.46	5.82	2	74.03
P1420_004_Ap_A_2_POS_18	0.0175	0.0137	5.9627	-	9.9018	0.0338	0.0255	0.0002	0.0056	0.0158	0.0141	0.0393	1.3456	0.0812	0.5732	18	0.7699	10.07	5.96	2	88.82
P1420_004_Ap_A_2_POS_19	0.0287	0.0143	5.9747	-	9.9022	0.0306	0.0134	0.0003	0.0061	0.0054	0.0148	0.0343	1.2329	0.1746	0.5925	18	0.7663	10.05	5.97	2	101.17
P1420_004_Ap_A_2_POS_21	0.0139	0	5.9487	-	10.0703	0.005	0.0033	0	0.0024	0.0068	0.0049	0.0151	1.8472	0.0076	0.1453	18.1	0.8517	10.12	5.95	2	94.61
P1420_004_Ap_A_2_POS_23	0	0	5.9119	-	10.2203	0	0	0	0	0	0	0	1.7715	0.0603	0.1683	18.1	0.8496	10.22	5.91	2	91.86
P1420_004_Ap_A_2_POS_24	0.0004	0.0008	5.9207	-	10.1634	0.0036	0.0009	0	0.0035	0.0028	0.0041	0.0103	1.5078	0.0261	0.4661	18.1	0.8386	10.19	5.92	2	92.52
P1420_004_Ap_A_2_POS_25	0.0631	0.0567	5.9349	-	9.8362	0.0175	0.0173	0	0.1341	0.0019	0.0124	0.032	0.7549	0.2212	1.0239	18.1	0.7127	10.17	5.93	2	102.91
P1420_004_Ap_A_2_POS_26	0	0	6.0134	-	9.9664	0	0	0	0	0	0	0	1.0804	0.0599	0.8597	18	0.8178	9.97	6.01	2	99.76
P1420_004_Ap_A_2_POS_31	0.0631	0.1023	6.0667	-	9.5611	0.0184	0.0313	0.0001	0.0092	0.0077	0.0129	0.0323	1.6219	0.0869	0.2912	17.9	0.7753	9.84	6.07	2	85.35
P1420_004_Ap_A_2_POS_32	0.0102	0.0585	5.9967	-	9.8523	0.0153	0.0332	0.0003	0.006	0.0065	0.005	0.0132	1.2239	0.0285	0.7476	18	0.7715	10	6	2	96.55
P1420_004_Ap_A_2_POS_33	0.0746	0.0553	5.8625	-	10.093	0.0321	0.0449	0	0.0131	0.0035	0.0126	0.0292	0.8953	0.3805	0.7242	18.2	0.6161	10.36	5.86	2	88.22
P1420_004_Ap_A_2_POS_34	0.0079	0.0019	5.9854	-	10.0086	0.0061	0.0052	0	0.0059	0.001	0.0003	0.002	1.307	0.0138	0.6792	18	0.8251	10.04	5.99	2	91.61
P1420_004_Ap_A_2_POS_35	0.0108	0.0006	5.994	-	9.955	0.0186	0.0036	0	0.004	0.0037	0.0044	0.0105	1.7188	0.0078	0.2733	18	0.8406	10.01	5.99	2	91.2
P1420_004_Ap_A_2_POS_37	0.0167	0.0395	5.9796	-	9.9021	0.0238	0.0273	0	0.0107	0.0038	0.0056	0.0167	1.1141	0.1265	0.7593	18	0.7516	10.05	5.98	2	96.82
P1420_004_Ap_A_2_POS_38	0.0735	0.0013	5.8843	-	10.1312	0.0343	0.0137	0.0012	0.0016	0.0311	0.0029	0.0108	2.1408	0	0	18.3	0.8307	10.3	5.89	2.14	96.41
P1420_004_Ap_A_2_POS_39	0.0102	0	5.8995	-	10.2222	0.0086	0.0022	0	0.0037	0.0012	0.0014	0.0037	1.7089	0.014	0.2771	18.2	0.8458	10.25	5.9	2	96.61
P1420_004_Ap_A_2_POS_40	0.0437	0.0366	6.0128	-	9.7921	0.0345	0.0271	0	0.0072	0.0018	0.0088	0.0218	1.0186	0.2142	0.7672	18	0.7182	9.97	6.01	2	91.21
P1420_004_Ap_A_2_POS_41	0.0134	0.0011	5.924	-	10.1434	0.0097	0.0038	0	0.0032	0.0015	0.0038	0.0095	1.7886	0.0379	0.1735	18.1	0.8432	10.19	5.92	2	93.1
P1420_004_Ap_A_2_POS_42	0.0067	0.0082	5.9522	-	10.0448	0.009	0.0188	0	0.005	0.0034	0.0042	0.0127	1.5059	0.0602	0.4339	18.1	0.8086	10.11	5.95	2	92.51
P1420_004_Ap_A_2_POS_43	0.0047	0	5.9816	-	10.0203	0.0062	0.0032	0	0.0036	0.0012	0.0022	0.0036	1.9204	0.0029	0.0767	18	0.8567	10.04	5.98	2	98.11
P1420_004_Ap_A_2_POS_44	0.031	0.0061	5.9692	-	9.9683	0.0134	0.0083	0	0.0074	0.0018	0.0133	0.0235	1.354	0.1855	0.4605	18	0.7893	10.07	5.97	2	95.6
P1420_004_Ap_A_2_POS_45	0.0125	0.0157	6.0397	-	9.8096	0.0168	0.0164	0.0002	0.0128	0.002	0.0039	0.0092	2.0969	0.0139	0	18	0.8367	9.9	6.04	2.11	94
P1420_004_Ap_A_2_POS_46	0.0097	0.012	6.0388	-	9.8082	0.0165	0.0161	0.0014	0.0111	0.0025	0.0052	0.0128	2.0966	0.0139	0	18	0.8373	9.89	6.04	2.11	94.05
P1420_004_Ap_A_2_POS_48	0.0382	0	6.0435	-	9.8045	0.0062	0.0049	0	0.0046	0.0181	0.0026	0.014	1.4081	0.0681	0.5238	17.9	0.8187	9.89	6.04	2	89.76
P1420_004_Ap_A_2_POS_49	0	0.0036	5.8871	-	10.2079	0.011	0.0101	0.0082	0.0041	0.0018	0.0056	0.0094	1.7701	0.0784	0.1515	18.1	0.8294	10.25	5.9	2	97.98
P1420_004_Ap_A_2_POS_50	0	0	6.038	-	9.8291	0.0003	0.026	0	0.0113	0	0.0023	0.0233	0.8354	0.2031	0.9615	17.9	0.7397	9.89	6.04	2	89.96
P1420_004_Ap_A_2_POS_51	0.0457	0.0003	5.8598	-	10.2228	0.0117	0.0061	0.0006	0.04	0.002	0.0094	0.0188	2.0164	0.0295	0	18.3	0.844	10.36	5.86	2.05	91.14
10FNARL008, Imperial Fm. (lithic arenite) Carcajou River section, ~0.74 %Ro, 64.752 N, 126.778 W
AFT Age-Grains
P1392_015_Ap_A_1_POS_0	0.0207897	0.00623009	5.9852	0.0145375	9.9209	0.0097422	0.00495414	0.000258082	0.008832	0.00103312	0.0070042	0.0137963	1.8563	0.0624049	-	17.912	0.843309	9.99354	5.99974	1.91871	96.508
P1392_015_Ap_A_1_POS_1	0.0124205	0.0143712	5.96706	0.032537	9.89232	0.00747419	0.0406911	0.000407777	0.00261896	0.00514359	0.00105901	0.00628856	1.85254	0.147462	-	17.9824	0.783418	9.9828	5.99959	2	96.2511
P1392_015_Ap_A_1_POS_2	0.00496725	0.0311971	5.9637	0.036222	9.77998	0.00566171	0.130174	8.21337e-05	0.00445336	0.00522765	0.00478989	0.0155616	1.85689	0.143104	-	17.982	0.609402	9.98209	5.99992	2	96.247
P1392_015_Ap_A_1_POS_3	0.0589899	0.141862	5.95538	0.0445603	9.69058	0.00659381	0.0403844	5.64644e-05	0.0187839	0.002548	0.0075137	0.0202269	1.82947	0.170532	-	17.9875	0.76317	9.98753	5.99994	2	96.4354
P1392_015_Ap_A_1_POS_4	0.0493413	0.0938171	5.96586	0.0339434	9.78456	0.00823482	0.0351271	0.000195922	0.0192194	0.000842457	0.00149295	0.00414585	1.82038	0.162107	-	17.9793	0.778995	9.99697	5.9998	1.98249	96.6264
P1392_015_Ap_A_1_POS_5	0.00708569	0.00530943	5.94933	0.0506689	9.94085	0.0055763	0.00582956	0	0.00187712	0.00276785	0.00616265	0.0151977	1.97167	0.0283305	-	17.9907	0.851102	9.99066	6	2	96.218
P1392_015_Ap_A_1_POS_6	0.110444	0.09147	5.95076	0.0488392	9.60883	0.0299166	0.0451886	0.000404127	0.00909693	0.00581668	0.0175535	0.0513878	1.56661	0.433394	-	17.9697	0.653	9.97011	5.9996	2	96.5718
P1392_015_Ap_A_1_POS_7	0.0179966	0.00225506	5.97849	0.0213795	9.94234	0.00755209	0.00502974	0.000126835	0.00153004	0.00787563	0.000225603	0.00150027	1.88611	0.0203934	-	17.8928	0.852697	9.98643	5.99987	1.90651	96.341
P1392_015_Ap_A_1_POS_8	0.0860257	0.0890549	5.9652	0.0347054	9.71332	0.0122844	0.0389323	9.86443e-05	0.0182222	0.00228049	0.00682831	0.0198589	1.80291	0.180355	-	17.9701	0.761919	9.98691	5.9999	1.98326	96.4888
P1392_015_Ap_A_1_POS_9	0.041593	0.00523949	5.97087	0.0289184	9.8415	0.012157	0.0135091	0.000215616	0.00498958	0.00866508	0.0115794	0.034356	1.74512	0.180645	-	17.8994	0.804871	9.97381	5.99978	1.92577	96.4004
P1392_015_Ap_A_1_POS_10	0.00225717	0.00134011	5.97401	0.0258827	9.95457	0.00843217	0.00260477	0.00010436	0.00593592	0.00338553	0.00204739	0.00834477	1.90471	0.0366817	-	17.9303	0.852739	9.98903	5.9999	1.94139	96.3409
P1392_015_Ap_A_1_POS_11	0.0107141	0.0880571	5.96543	0.0345009	9.79676	0.0105147	0.0569655	6.69525e-05	0.0058684	0.00489202	0.00318685	0.00994945	1.83028	0.0960397	-	17.9132	0.764358	9.98698	5.99993	1.92632	96.4516
P1392_015_Ap_A_1_POS_12	0.0449403	0.05606	5.96451	0.0316062	9.74382	0.0100597	0.0545019	0.00387854	0.0086751	0.00556982	0.0133	0.0362199	1.40623	0.59377	-	17.9731	0.595567	9.97703	5.99612	2	96.9082
P1392_015_Ap_A_1_POS_15	0.0511513	0.144275	5.96957	0.0301835	9.67148	0.00868616	0.0344908	0.000241789	0.0172873	0.00383198	0.0111342	0.0329828	1.93602	0.0639778	-	17.9753	0.793011	9.97556	5.99976	2	96.0454
P1392_015_Ap_A_1_POS_16	0	0.00202497	5.98183	0.0181669	9.98776	0.00408401	0.00120605	0	0.00175833	0.000540199	0.000598165	0.000981134	1.86389	0.0277543	-	17.8906	0.859088	9.99895	6	1.89164	96.5889
P1392_015_Ap_A_1_POS_17	0.0255937	0.134199	5.98264	0.0172686	9.72281	0.00623304	0.0258054	9.49477e-05	0.0393742	0.00207523	0.00818956	0.0208618	1.82454	0.157198	-	17.9669	0.788602	9.98524	5.9999	1.98174	96.4221
P1392_015_Ap_A_1_POS_18	0.0185831	0.00343544	5.97184	0.0280369	9.89663	0.00778562	0.00377175	0.000123018	0.00353455	0.00268373	0.0126678	0.0346064	1.95435	0.0456464	-	17.9837	0.846792	9.98382	5.99988	2	96.1502
P1392_015_Ap_A_1_POS_19	0.0169551	0.0164177	5.98553	0.0143321	9.87345	0.008153	0.0240506	0.000137545	0.00743435	0.00412926	0.00871126	0.0234335	1.64002	0.359982	-	17.9827	0.754351	9.98287	5.99986	2	96.6601
P1392_015_Ap_A_1_POS_20	0.0501473	0.117301	5.96791	0.0318561	9.62849	0.0139422	0.115574	0.00023243	0.00928685	0.00347202	0.0119022	0.0302331	1.59189	0.408111	-	17.9804	0.421595	9.98058	5.99977	2	96.7105
P1392_015_Ap_A_1_POS_21	0.0227132	0.010646	5.98045	0.0194832	9.88665	0.0146653	0.011901	6.82061e-05	0.0102688	0.0028957	0.00705274	0.0203154	1.79582	0.174921	-	17.9579	0.810027	9.98718	5.99993	1.97074	96.5081
P1392_015_Ap_A_1_POS_22	0.000121002	0.0073439	5.97228	0.0277205	9.98099	0.00316051	0.00569128	0	0.00189093	0.000469796	2.64874e-06	1.30507e-05	1.90805	0.0286914	-	17.9364	0.854354	9.99968	6	1.93674	96.5222
P1392_015_Ap_A_1_POS_23	0.011815	0	5.95895	0.0410213	9.9619	0.00621399	0.00147486	2.47003e-05	0.000719303	0.011452	3.8318e-05	0.00012325	1.93878	0.0268799	-	17.9594	0.856764	9.99377	5.99998	1.96566	96.3575
P1392_015_Ap_A_1_POS_24	0.0705334	0.00214506	5.97795	0.0218682	9.75661	0.0111636	0.00518783	0.00017982	0.00484446	0.0343283	0.0121408	0.0413389	1.98397	0.0111815	-	17.9335	0.841887	9.93848	5.99982	1.99516	95.3228
P1392_015_Ap_A_1_POS_25	0.0585806	0.0753763	5.96827	0.0317317	9.61406	0.00621751	0.0187008	0	0.140576	0.00241682	0.0163336	0.0416214	1.94612	0.0538804	-	17.9739	0.81146	9.97388	6	2	96.0057
P1392_015_Ap_A_1_POS_26	0.0316037	0.00856541	5.95954	0.0403584	9.86265	0.00979927	0.00875481	0.00010521	0.00425117	0.00823356	0.0108444	0.030456	1.79168	0.208318	-	17.9752	0.807338	9.97526	5.9999	2	96.2714
P1392_015_Ap_A_1_POS_27	0.00724889	0.00151189	5.97554	0.0242593	9.93695	0.00922431	0.00320585	0.000200241	0.00694242	0.0052736	0.00309751	0.0108894	1.89745	0.0535065	-	17.9353	0.847861	9.98454	5.9998	1.95096	96.2681
AFT Length-Grains
P1392_015_Ap_A_2_POS_0	0.0268475	0.0175785	5.9828	0.0169781	9.82092	0.00899324	0.0411011	0.000224034	0.00582935	0.00903679	0.0110843	0.0329535	1.67202	0.209476	-	17.8558	0.762097	9.97457	5.99978	1.8815	96.5717
P1392_015_Ap_A_2_POS_1	0.00371957	0.00223539	5.97358	0.0263675	9.85083	0.00670525	0.0998356	5.297e-05	0.00442775	0.00311953	0.00485578	0.0135059	1.89516	0.104839	-	17.9892	0.700176	9.98928	5.99995	2	96.3482
P1392_015_Ap_A_2_POS_2	0.0499889	0.170882	5.97604	0.0239419	9.67388	0.0063008	0.0358056	1.49105e-05	0.0200035	0.00222822	0.00778568	0.0206023	1.79487	0.174006	-	17.9564	0.767585	9.98749	5.99998	1.96887	96.5173
P1392_015_Ap_A_2_POS_3	0.00399866	0.0084292	5.98809	0.0118229	9.94259	0.00614142	0.00465885	8.97215e-05	0.00258749	0.00219824	0.00590368	0.0141654	1.91596	0.0597798	-	17.9664	0.846673	9.99076	5.99991	1.97574	96.3358
P1392_015_Ap_A_2_POS_5	0.0365672	0.00343072	5.97843	0.0213857	9.84661	0.0124077	0.0121221	0.00018895	0.00435668	0.00788066	0.0125601	0.0370538	1.78697	0.201658	-	17.9616	0.802446	9.97318	5.99981	1.98863	96.2794
P1392_015_Ap_A_2_POS_6	0.0117658	0.00477946	5.95815	0.0412496	9.92733	0.0103227	0.0151787	0.000597415	0.00646882	0.00331714	0.00179217	0.00774562	1.6787	0.321297	-	17.9887	0.779275	9.9893	5.9994	2	96.7094
P1392_015_Ap_A_2_POS_7	0.0497636	0.0173375	5.98086	0.0190612	9.80927	0.0170322	0.0191548	7.82571e-05	0.0109738	0.00218078	0.0149463	0.0408439	1.58906	0.41094	-	17.9815	0.738402	9.98158	5.99992	2	96.7781
P1392_015_Ap_A_2_POS_8	0.0193674	0.00707191	5.98237	0.0176027	9.88684	0.0146926	0.0122815	2.62065e-05	0.0110767	0.00274835	0.00778337	0.0246884	1.76596	0.14865	-	17.9012	0.814859	9.98658	5.99997	1.91461	96.5687
P1392_015_Ap_A_2_POS_9	0.0575229	0.0626918	5.97817	0.0218155	9.74221	0.0178955	0.0548567	1.15079e-05	0.00391024	0.00306723	0.0105859	0.0302827	1.64041	0.273667	-	17.8971	0.711216	9.98304	5.99999	1.91407	96.7431
P1392_015_Ap_A_2_POS_10	0.0300795	0.0105793	5.97987	0.0198845	9.89916	0.0198631	0.00670181	0.000247229	0.00207323	0.00130157	0.0105589	0.0144837	1.83144	0.0273148	-	17.8536	0.842814	9.99504	5.99975	1.85876	96.5781
P1392_015_Ap_A_2_POS_11	0.0104862	0.0188352	5.98175	0.0179773	9.87258	0.0102868	0.0419095	0.000274962	0.00624874	0.00524123	0.00321276	0.0146351	1.84922	0.0429499	-	17.8756	0.801834	9.98371	5.99973	1.89217	96.3623
P1392_015_Ap_A_2_POS_12	0.015999	0.00275157	5.9757	0.024151	9.91891	0.00730422	0.00747053	0.000153592	0.000709283	0.0155658	0.00147801	0.00671002	1.81582	0.0442709	-	17.837	0.844674	9.97705	5.99985	1.86009	96.3427
Husky7, Imperial Fm. (fine grain sandstone) Redstone River section, ~1.67 %Ro, 63.916 N, 125.198W
AFT Age-Grains
P943_07_AP_A_1_POS_1	0.0099	0.0025	5.8839	-0.0013	10.167	0.0115	0.0114	-	0.0069	0.0027	-0.0019	-0.0025	1.7748	0.0403	0.1847	17.9052	0.83378	10.21	5.88	2	99.235
P943_07_AP_A_1_POS_2	0.0069	0.0053	5.7769	0.0094	10.1587	0.0152	0.006	-	-0.0052	0.0038	0.0311	0.0499	1.5131	0.0486	0.438	17.6197	0.82022	10.27	5.79	2	94.863
P943_07_AP_A_1_POS_3	0.0778	0.0028	5.5153	0.1176	10.5256	0.0016	0	-	0.0022	0.002	0.0063	0.0056	1.4328	0.0356	0.5324	17.7252	0.83112	10.62	5.63	2	89.022
P943_07_AP_A_1_POS_4	0	0.0076	5.7827	0.0013	10.0862	0.0057	0.0184	-	0.0039	0.0063	0.005	0.0068	1.212	0.0086	0.7803	17.1445	0.80438	10.14	5.78	2	99.453
P943_07_AP_A_1_POS_5	0.01	0	5.8615	0.0128	10.06	0.0102	0	-	-0.001	0.0155	0.0095	0.015	1.6298	0.0232	0.347	17.6465	0.84111	10.12	5.87	2	98.442
P943_07_AP_A_1_POS_6	0.0668	0.0135	5.6187	0.0694	10.2636	0.02	0.0182	-	0.0021	0.0048	0.0047	0.0219	1.1352	0.1721	0.6937	17.411	0.75874	10.42	5.69	2	93.647
P943_07_AP_A_1_POS_7	0.0276	0.0027	5.9303	-0.0013	10.0378	0.0075	0.0104	-	0	0.0161	0	0.03	1.4803	0.4464	0.0736	17.9878	0.75117	10.13	5.93	2	95.623
P943_07_AP_A_1_POS_8	0.0663	0.0992	5.5884	0.0851	10.0953	0.0046	0.0346	-	0.0835	0.0019	-0.0093	0.002	1.0697	0.0671	0.8632	17.1884	0.74714	10.38	5.67	2	93.917
P943_07_AP_A_1_POS_9	0.0131	0	5.8459	0.014	10.158	0.0072	-0.0014	-	0.0039	0.0036	0.0106	0.0192	1.7445	0.0172	0.238	17.8358	0.84972	10.21	5.86	2	99.945
P943_07_AP_A_1_POS_10	0.0132	0.0025	5.9005	0.0166	9.96	0.0188	0.0114	-	0.0069	0.0018	0.0094	0.0056	1.5079	0.1587	0.3341	17.6133	0.79811	10.03	5.92	2	98.875
P943_07_AP_A_1_POS_11	0.0033	0.0025	5.7119	0.0152	9.7593	0.0057	0.0437	-	0.001	0.0009	0.0037	0.0086	0.2774	0.0429	1.6807	15.8761	0.78874	9.83	5.73	2	98.115
P943_07_AP_A_1_POS_12	0.0197	0	5.8659	0.0406	9.9421	0.0086	0.0057	-	0.0049	0.0036	0.0019	0.0062	1.5144	0.0344	0.4504	17.448	0.82924	9.99	5.91	2	99.019
P943_07_AP_A_1_POS_13	0.0133	0.0487	5.8544	0.0052	9.9841	0.0058	0.0288	-	0.0558	0.0018	0.0108	0.0082	1.3264	0.3001	0.3743	17.6434	0.73566	10.16	5.86	2	98.693
P943_07_AP_A_1_POS_14	0.0034	0.0311	5.8264	-0.0013	10.0041	0.0044	0.0189	-	0.0313	0.0056	0.0225	0.0159	1.3545	0.0826	0.5619	17.3994	0.79455	10.14	5.83	2	97.019
P943_07_AP_A_1_POS_15	-0.0066	0	5.9448	0	10.0827	0.0014	0	-	0.0059	0.0009	-0.0038	-0.0019	1.8802	0.0029	0.1169	17.9065	0.86142	10.08	5.94	2	98.95
P943_07_AP_A_1_POS_16	-0.0065	0.005	5.9275	0	10.1035	0.0029	0.0099	-	0.0078	0.0063	0.0012	0.0006	2.0808	0.0057	0	18.1447	0.85368	10.13	5.93	2.09	100.199
P943_07_AP_A_1_POS_17	0.0197	0	5.948	0.0013	10.0699	0.0043	0.0042	-	0.0049	0.0126	-0.0019	-0.0068	2.0512	0.0029	0	18.1103	0.85885	10.11	5.95	2.05	99.395
P943_07_AP_A_1_POS_18	0.0066	0.0025	5.9082	0.0229	10.0432	0.0143	0.0042	-	0.0059	0.0045	0.0181	0.0043	1.8852	0.0201	0.0944	17.94	0.84695	10.1	5.93	2	99.629
P943_07_AP_A_1_POS_19	0.0065	0	5.9515	0.0025	10.0209	0.0085	0.0056	-	0.0029	0.0018	-0.0037	-0.0055	1.8284	0.0028	0.1679	17.8222	0.85	10.04	5.95	2	99.819
P943_07_AP_A_1_POS_20	0.0158	0.0024	5.9886	0.011	9.7468	0.0124	0.0014	-	0.0066	0.0147	-0.0006	0.0048	1.6123	0.0083	0.3793	17.4245	0.84017	9.8	6	2	102.374
P943_07_AP_A_1_POS_21	0.0277	0.0053	5.706	0.0161	10.2169	0.003	0.0015	-	0.0093	0.0019	-0.0033	0.0261	1.0607	0.1391	0.8	17.2103	0.79664	10.29	5.72	2	94.729
P943_07_AP_A_1_POS_22	0.02	0.0026	5.8938	0	10.0988	0.0073	0.0086	-	0.004	0.0055	0.0222	0.0341	1.8525	0.0642	0.0832	18.0136	0.83467	10.2	5.89	2	98.573
P943_07_AP_A_1_POS_23	0.0883	0.0365	5.7904	0.0815	9.9957	0.003	0.0234	-	0.1056	0.0047	0.0168	0.0167	2.0042	0.0237	0	18.1905	0.81931	10.29	5.87	2.03	97.328
P943_07_AP_A_1_POS_24	0.106	0.0102	5.7491	0.1334	9.9456	0.0116	0.0186	-	0.0277	0.0036	0.0132	0.0219	1.6916	0.1043	0.2043	17.8368	0.80045	10.16	5.88	2	98.999
P943_07_AP_A_1_POS_25	0.0131	0.005	5.7263	0.0013	9.7839	0.01	0.0028	-	0.0029	0.0063	0.0193	0.0229	0.3262	0.0802	1.593	16.0002	0.82324	9.87	5.73	2	98.334
P943_07_AP_A_1_POS_26	0.0098	0.0025	5.9936	0	9.9294	0.0029	0.0028	-	0.002	0.0072	0.0087	0.0111	2.0452	0.0171	0	18.0323	0.85774	9.98	5.99	2.06	99.84
P943_07_AP_A_1_POS_27	0.0163	0	5.9142	0.0264	10.0556	0.0057	0.0014	-	0.0126	0.0018	0.0161	0.0061	1.9632	0.0057	0.0314	18.0251	0.85805	10.12	5.94	2	100.614
P943_07_AP_A_1_POS_28	0.0067	0	5.8358	0.0026	10.1428	0.0102	0	-	0.002	0.0211	0.0013	0.0025	2.4114	0.0029	0	18.4393	0.86063	10.19	5.84	2.41	98.042
P943_07_AP_A_1_POS_29	0.0065	0	5.8818	0	10.0236	0.0029	0.0042	-	0.0088	0.0036	-0.0093	0.0093	1.4599	0.0457	0.4947	17.437	0.8304	10.05	5.88	2	99.561
P943_07_AP_A_1_POS_30	0.0164	0	5.9021	-0.0013	10.059	0.0072	0.0071	-	0.003	0.0054	0.01	0.0236	1.7109	0.0776	0.2114	17.821	0.82987	10.13	5.9	2	99.67
P943_07_AP_A_1_POS_31	-0.0033	0.0025	5.9053	0	10.1243	-0.0014	0.0171	-	0.0099	0	0.0019	-0.0006	2.165	0.0029	0	18.2236	0.84837	10.15	5.91	2.17	98.769
P943_07_AP_A_1_POS_32	0.0198	-0.0025	5.9707	0.0013	9.9382	0.0086	0.0071	-	0.0039	0.0208	0	0.0025	2.1353	0.0029	0	18.1086	0.85311	10	5.97	2.14	98.796
P943_07_AP_A_1_POS_33	0.0297	0.033	5.8191	0.0268	9.8974	0.0144	0.0299	-	0.0158	0.0036	0.022	0.033	1.1249	0.3173	0.5576	17.3669	0.71024	10.08	5.85	2	99.534
P943_07_AP_A_1_POS_34	0.01	0.0026	5.9198	0.009	10.1157	0.0058	0	-	0.003	0.0018	0.0101	0.0019	1.9577	0.0029	0.0404	18.0403	0.86091	10.15	5.93	2	98.398
AFT Length-Grains
P943_07_AP_A_2_POS_1	0.0065	0.0025	5.886	0.0126	9.9781	0.0114	0.007	-	0.001	0.0036	0.0049	0.0086	1.5384	0.0256	0.4362	17.4862	0.82939	10.02	5.9	2	100.028	1
P943_07_AP_A_2_POS_2	0.0404	-0.0026	5.8769	0.03	10.0411	0.0044	0.0116	-	0.003	0.0009	0.0122	0.0013	2.2229	0.0147	0	18.2568	0.84726	10.11	5.91	2.24	97.083
P943_07_AP_A_2_POS_3	0.0364	0	5.875	0.0256	9.9962	0.0116	0.0385	-	0	0.0045	0.0189	0.0237	1.6131	0.1879	0.1999	17.8314	0.7614	10.13	5.9	2	99.346
P943_07_AP_A_2_POS_4	0.045	0.0124	5.797	0.0833	9.7184	0.0042	0.018	-	0.0433	0.0018	0.0073	0.0146	1.0852	0.1068	0.8072	16.9373	0.77588	9.86	5.88	2	100.833
P943_07_AP_A_2_POS_5	0.0219	0.0024	5.8843	0.0425	9.7981	0.0082	0.0014	-	0.0009	0.0026	-0.0042	0.0089	1.2425	0.0986	0.6583	17.1081	0.81229	9.84	5.93	2	103.076
P943_07_AP_A_2_POS_6	0.1862	0.0904	5.7044	0.0923	9.7464	0.0043	0.0324	-	0.0508	0.0009	0.005	0.0031	1.0761	0.0628	0.862	17.0551	0.744	10.12	5.8	2	99.454
P943_07_AP_A_2_POS_8	0.1062	0.0128	5.7764	0.131	9.8715	0.0072	0.0129	-	0.0397	0.0027	0.0151	0.0238	2.1319	0.0812	0	18.2124	0.8233	10.09	5.91	2.21	98.808
P943_07_AP_A_2_POS_9	0.0098	0.0075	5.8288	0.0025	9.3874	0.0028	0.0379	-	0.0214	0.0009	-0.0019	0.0006	0.0583	0.0227	1.9186	15.3787	0.81304	9.47	5.83	2	97.446
P943_07_AP_A_2_POS_10	0.0955	0.0051	5.7492	0.1084	9.8279	0.0029	0.0043	-	0.0581	0.0018	0.0213	0.0174	1.3645	0.0461	0.5898	17.3025	0.81395	10.03	5.86	2	99.055
P943_07_AP_A_2_POS_11	0.0372	0.0026	5.7412	0.093	10.0648	0.003	0.0044	-	0.0668	0.0056	0.0225	0.0575	1.8278	0.0148	0.158	17.9412	0.84059	10.26	5.83	2	97.716
P943_07_AP_A_2_POS_12	0.0167	0.0804	5.0197	0	10.4094	0.0073	0.065	-	-0.0063	0.0034	0.004	0.0119	1.98	0.0219	0	17.6134	0.77394	10.59	5.02	2	78.225
P943_07_AP_A_2_POS_13	0.0129	0.0619	5.622	0	9.6057	0.0056	0.05	-	-0.0048	0.0027	0.0031	0.0091	4.379	0.0169	0	19.7641	0.7984	9.75	5.62	4.4	99.745
P943_07_AP_A_2_POS_14	0.0339	0.0026	5.826	0.0341	9.9992	0.0118	0.0073	-	0.0061	0.0019	0.0168	0.0288	1.4262	0.1392	0.4349	17.5339	0.80218	10.11	5.86	2	96.653
P943_07_AP_A_2_POS_16	0.0198	0.0102	5.7746	-0.0013	9.8664	0.0043	0.057	-	0.002	0.0027	-0.0044	-0.0044	0.7065	0.0405	1.253	16.4739	0.74458	9.95	5.77	2	97.5
P943_07_AP_A_2_POS_17	0.0274	0.0026	5.8257	0.0159	10.0662	0.0045	0.0059	-	0.0113	-0.0028	0.0248	0.0252	1.4311	0.1438	0.4256	17.5816	0.80715	10.17	5.84	2	95.786
P943_07_AP_A_2_POS_18	0.0094	0	5.7288	0	9.7305	0.0095	0.0054	-	-0.0028	0.0034	0.0059	0.01	0.1628	0.0327	1.8039	15.6956	0.84181	9.77	5.73	2	102.591
P943_07_AP_A_2_POS_19	0.0719	0.043	5.4057	0.0834	10.6936	0.0052	0.0224	-	0.1087	0	0.0084	0.0279	2.5202	0.0244	0	19.0148	0.81994	10.98	5.49	2.54	84.185
P943_07_AP_A_2_POS_20	0.0385	0	5.5943	0.0194	10.8542	0.0034	0.0166	-	0.0058	0.0021	0.0015	0.0174	1.6756	0.2724	0.0516	18.5012	0.78766	10.94	5.61	2	87.281
P943_07_AP_A_2_POS_21	0.0337	0	5.8772	0.0169	10.0417	0.0029	0.0145	-	0.005	0.0018	0.0013	0.0152	1.4655	0.2383	0.2956	17.714	0.78556	10.12	5.89	2	97.364
P943_07_AP_A_2_POS_22	0	0	5.8815	0.0117	10.049	0.0103	0.0058	-	0.006	0.0018	-0.0045	0.0025	1.5819	0.0383	0.38	17.5843	0.83284	10.07	5.89	2	96.674
P943_07_AP_A_2_POS_23	0	0	5.8815	0.0117	10.049	0.0103	0.0058	-	0.006	0.0018	-0.0045	0.0025	1.5819	0.0383	0.38	17.5843	0.83284	10.07	5.89	2	96.674
P943_07_AP_A_2_POS_25	0.0033	0.005	5.9686	0.0013	9.9669	0.0043	0.0014	-	0.0078	0.0045	-0.0025	0.0025	1.8191	0.0171	0.1628	17.7993	0.8529	9.99	5.97	2	99.757
P943_07_AP_A_2_POS_26	0.0093	0.2224	5.4333	0.0048	9.2832	0.0014	1.0439	-	-0.0884	0.0026	-0.0018	0.0012	0.0964	0.0408	1.8635	16.0491		10.47	5.44	2	105.569
P943_07_AP_A_2_POS_27	0.0327	0	5.9386	0.0304	9.7096	0.0071	0.0071	-	0.001	0.0081	0.0037	0.0253	1.4039	0.0658	0.5305	17.2333	0.81609	9.79	5.97	2	98.903
P943_07_AP_A_2_POS_28	0.0165	0.0101	5.9283	-0.0013	9.9505	0.0086	0.0057	-	0.0069	0.0108	0.02	0.0155	1.6705	0.0835	0.2464	17.7256	0.82678	10.04	5.93	2	99.31
P943_07_AP_A_2_POS_29	0.0582	0.0839	5.6551	0.0225	10.2763	0.0079	0.0283	-	0.049	0.003	0.0173	0.0165	1.4306	0.0414	0.5288	17.69	0.78213	10.54	5.68	2	90.851
P943_07_AP_A_2_POS_30	0.0295	0.0256	5.6367	0.0229	10.4119	0.0145	0.0207	-	0.0188	0.001	0.0204	0.0139	1.1447	0.2938	0.5612	17.6544	0.73553	10.56	5.66	2	89.868
P943_07_AP_A_2_POS_31	0.0266	0.023	5.8104	0.0206	9.9276	0.0131	0.0187	-	0.0169	0.0009	0.0184	0.0126	1.031	0.2646	0.704	17.1844	0.73903	10.06	5.83	2	98.255
P943_07_AP_A_2_POS_32	0.0032	-0.0025	5.9009	-0.0012	9.8705	0.0042	0.0056	-	0.0077	-0.0009	-0.0043	0.0018	1.2553	0.0056	0.739	17.0459	0.82516	9.89	5.9	2	100.263
P943_07_AP_A_2_POS_34	0.0164	-0.0025	5.8872	0.014	10.0488	0.0129	0.0113	-	0.002	0.0027	0.0194	0.0149	1.747	0.0459	0.2075	17.82	0.82895	10.13	5.9	2	99.688
P943_07_AP_A_2_POS_35	0.01	0.0026	5.9079	0.0168	10.1022	0.0131	0.0043	-	0.006	0.0009	0	0.0126	1.8922	0.0554	0.0526	18.024	0.84347	10.15	5.92	2	98.244
P943_07_AP_A_2_POS_37	0.0075	0.1879	5.5015	0.0175	9.8563	0.0033	0.6064	-	-0.0292	0.0031	-0.0064	0.005	0.8339	0.0394	1.1264	17.0262		10.63	5.52	2	87.892
P943_07_AP_A_2_POS_38	0.0032	-0.0025	5.9048	0.0063	9.975	0.0085	0.0042	-	0.001	0.0027	-0.0086	0.0006	1.4822	0.0396	0.4785	17.417	0.83125	9.98	5.91	2	100.285
P943_07_AP_A_2_POS_39	0.0198	0	5.8039	0.0205	9.9902	0.013	0.0057	-	0.0049	0.0045	0.0132	0.0194	1.2408	0.0607	0.6985	17.1966	0.80829	10.07	5.82	2	98.542
P943_07_AP_A_2_POS_40	0.0276	0	5.7621	0.028	10.341	0.0135	0.0089	-	0.0062	0.0019	0.0046	0.0007	1.7591	0.009	0.2325	17.9626	0.83791	10.4	5.79	2	95.438
P943_07_AP_A_2_POS_41	0.0136	0	5.8035	0.0158	10.1315	0.0089	-0.0015	-	0.0071	0.0028	0.0071	0.0013	1.4059	0.0445	0.5492	17.4405	0.83126	10.17	5.82	2	96.167
P943_07_AP_A_2_POS_42	0.0066	0.0151	5.9369	0.0013	9.8673	0.0029	0.0127	-	0.0088	0.0018	-0.0025	0.0068	1.5039	0.0287	0.4684	17.3903	0.82373	9.92	5.94	2	98.774
P943_07_AP_A_2_POS_43	0	0	5.6569	0	10.458	0.0063	0.0093	-	0.0065	0.0138	-0.0116	-0.0014	1.2258	0.022	0.7525	17.3856	0.81572	10.48	5.66	2	91.251
P943_07_AP_A_2_POS_44	0.0464	0	5.7794	0.068	9.9566	0.0101	0.0043	-	0.0069	0.0055	0.012	0.0056	1.298	0.0783	0.6235	17.2711	0.81065	10.05	5.85	2	98.132
P943_07_AP_A_2_POS_45	0.0032	-0.0025	5.9255	0	9.7553	0.0183	0.0083	-	0.0029	0.0009	0.0129	0.0225	1.1142	0.1887	0.6965	17.0502	0.77607	9.82	5.93	2	100.723
P943_07_AP_A_2_POS_46	0.0033	0.0051	5.9041	0.0039	10.0873	0.0058	0.0086	-	0.003	0.0055	-0.0013	0.0019	1.7833	0.0029	0.2146	17.8134	0.84484	10.12	5.91	2	98.168
P943_07_AP_A_2_POS_47	0.007	0.0027	5.7717	0.019	10.2297	0.0092	0.0091	-	0.0052	0.0077	0.0134	0.0159	1.563	0.0399	0.3975	17.6935	0.82543	10.3	5.79	2	93.599
P943_07_AP_A_2_POS_48	0.0102	0.0053	5.9037	0	9.9246	0.0134	0.0118	-	-0.0051	0.0291	0.0351	0.0832	2.0551	0.0746	0	18.141	0.82582	10.11	5.9	2.13	96.84
P943_07_AP_A_2_POS_49	0.0033	-0.0051	5.8983	0.0401	10.1046	-0.0015	0.0029	-	0.005	0.0018	-0.0032	0	2.0541	0.0029	0	18.1032	0.864	10.11	5.94	2.06	97.7
P943_07_AP_A_2_POS_50	0.0034	0.0026	5.8403	0.0224	10.1378	0.0119	0	-	0.0041	0.0028	-0.0039	0.0058	1.6334	0.0327	0.3338	17.6933	0.84133	10.16	5.86	2	95.857
P943_07_AP_A_2_POS_51	0.0166	0.0051	5.9411	0.0154	10.0066	0.016	0.0014	-	0.002	0.0118	-0.0038	0.0006	1.8464	0.0551	0.0978	17.9143	0.84351	10.06	5.96	2	98.243
P943_07_AP_A_2_POS_52	0	0	5.8569	0.0392	10.07	-0.0014	-0.0028	-	0.002	0.0036	-0.005	-0.0019	2.3517	0.0029	0	18.3152	0.86997	10.06	5.9	2.35	99.561
P943_07_AP_A_2_POS_53	0.0273	0.0026	5.7847	0.0595	10.2066	0.0045	0.0015	-	0.0041	0.0038	0.0072	0.0181	2.1459	0.0209	0	18.2867	0.85658	10.28	5.84	2.17	96.153
P943_07_AP_A_2_POS_54	0.0097	0	5.8809	0.0163	9.9526	0.0043	0.0014	-	0.0029	0.0009	-0.0006	0.0055	1.4095	0.0426	0.548	17.326	0.83117	9.98	5.9	2	99.857
P943_07_AP_A_2_POS_55	0.0328	0.0025	5.7823	0.094	9.8271	0.0057	0.0057	-	0.0216	0.0018	0.0225	0.0143	1.2744	0.0746	0.6507	17.1593	0.80907	9.93	5.88	2	99.002
P943_07_AP_A_2_POS_56	-0.0033	-0.0025	5.8453	0	9.8057	0.0187	0.0128	-	0.0079	0.0009	-0.0013	0.005	0.8642	0.0575	1.0779	16.6109	0.789	9.84	5.85	2	97.941
P943_07_AP_A_2_POS_57	0.0036	-0.0027	5.7581	0.0014	10.4686	0.0094	0.0046	-	0.0021	0.0078	0.0068	0.0229	2.1085	0.0125	0	18.4036	0.85404	10.52	5.76	2.12	92.747
P943_07_AP_A_2_POS_58	0.0166	0.0026	5.8792	0.0437	10.115	0.0044	0.0029	-	0.003	0.0018	0.0101	0.01	1.9395	0.0552	0.0045	18.084	0.85007	10.17	5.92	2	98.698
P943_07_AP_A_2_POS_59	0.0202	0.0026	5.9236	0.0299	9.9922	0.0279	0.0029	-	-0.004	0.0055	0.0096	0.0222	1.9893	0.0382	0	18.0601	0.8428	10.08	5.95	2.03	97.432
P943_07_AP_A_2_POS_60	0.0725	-0.0025	5.8608	0.0855	9.7715	0.0058	-0.0043	-	0.0572	0.0054	0.01	0.0342	1.6833	0.0086	0.3071	17.588	0.84449	9.95	5.95	2	98.957
P943_07_AP_A_2_POS_61	-0.0034	0.0078	5.8927	0.0026	10.1486	0.0193	0.0103	-	0.0061	0.0065	-0.0006	0.0071	1.7249	0.1754	0.1005	17.9973	0.80896	10.2	5.9	2	96.599
P943_07_AP_A_2_POS_62	0.0096	0.0049	5.953	0.0037	9.8264	0.0126	0.0069	-	0.0096	0.0088	0.0049	0.0049	1.563	0.0112	0.4259	17.4195	0.83119	9.89	5.96	2	100.806
P943_07_AP_A_2_POS_63	0.0096	-0.0074	5.9469	0.0124	9.8143	0.0112	0.011	-	0.0057	0.0044	-0.0024	0.0102	1.4786	0.0474	0.4747	17.3419	0.81913	9.86	5.96	2	101.45
P943_07_AP_A_2_POS_64	0.0136	0.0026	5.7479	0.0066	10.1942	0.0208	0.0103	-	0.0031	0.0065	0.0246	0.0328	1.3104	0.1339	0.5548	17.5073	0.78895	10.31	5.75	2	96.822
P943_07_AP_A_2_POS_65	0.1338	0.0659	5.7943	0.0199	9.767	0.018	0.037	-	0.0605	0.0038	0.0065	0.0175	1.1805	0.024	0.7953	17.1287	0.74685	10.11	5.81	2	95.011
P943_07_AP_A_2_POS_66	0.0266	0.0026	5.9359	0.0013	10.021	0.016	0.0086	-	0.007	0.0055	0.0057	0.005	1.6448	0.2269	0.1278	17.9069	0.79866	10.1	5.94	2	98.491
P943_07_AP_A_2_POS_67	0.0033	0	5.879	0.0255	10.0628	0.0101	0.0028	-	0.0049	0.0027	0.0088	0.0006	1.7266	0.0231	0.2507	17.7502	0.84408	10.1	5.9	2	98.942
P943_07_AP_A_2_POS_68	0	0.0027	5.7715	0.027	10.2806	0.0122	0.0105	-	0.0021	0.0048	0.0418	0.0402	1.8536	0.0427	0.104	18.0897	0.83319	10.39	5.8	2	95.129
P943_07_AP_A_2_POS_69	0.0133	0.0051	5.8778	0.0347	9.9291	0.0116	0.0057	-	0.003	0.0027	0.0164	0.0194	1.602	0.0319	0.3655	17.5527	0.83087	10.01	5.91	2	98.239
P943_07_AP_A_2_POS_70	0.0225	-0.0049	5.876	0.0411	9.822	0.0084	0.0069	-	0.0019	0.0027	0.0092	0.0219	1.386	0.0338	0.5805	17.2275	0.82073	9.89	5.92	2	100.75
P943_07_AP_A_2_POS_71	-0.0098	0	5.8284	0.0013	9.8256	0.0086	0.0113	-	0.0107	0.0036	0.0019	0.0031	0.7671	0.1085	1.1234	16.5603	0.78731	9.85	5.83	2	98.787
P943_07_AP_A_2_POS_72	0.0352	0	5.7971	0.034	10.1414	0.0154	0.0121	-	0.0042	0.0039	0.0274	0.0538	1.635	0.1906	0.174	17.9501	0.7945	10.29	5.83	2	94.178
P943_07_AP_A_2_POS_73	0.0292	0.0075	5.9314	0.0088	9.7895	0.0113	0.014	-	0.0136	0.0053	0.0037	0.0141	1.2947	0.1841	0.5208	17.3072	0.78022	9.89	5.94	2	100.326
P943_07_AP_A_2_POS_75	0.117	0.0463	5.7059	0.1488	9.761	0.0131	0.036	-	0.013	0.0009	0.0159	0.0284	1.1394	0.2746	0.5862	17.3003	0.70187	10.03	5.85	2	97.767
P943_07_AP_A_2_POS_76	0.0201	0.0026	5.8269	0.0323	10.0293	0.0175	0.0173	-	0	0.0028	0.0178	0.0265	1.4504	0.1724	0.3769	17.6159	0.7833	10.13	5.86	2	98.152
Note: Elemental concentrations in atoms per formula unit (apfu) were caluclated from weight % oxide using the stoichiometric relationships of Ketcham., (2015), and rmr0 was determined using the calculations of Carlson et al., (1999). For samples JPCPC3 and JPCPC4 Na, Mg, Mn, Fe, As, Sr, Y, La, and Ce were measured using LA-ICP-MS, whereas P, Ca, F and Cl were measured via EPMA. LA-ICPMS apatite c…
